# Supplementary material for: Executioner caspases degrade essential mediators of pathogen-host interactions to inhibit growth of intracellular Listeria monocytogenes
Source: Research Square preprint supplement (doi:10.21203/rs.3.rs-4655845/v1), 2024-08-28
Supplement: Supplementary file 1 [file b7b753c17f6985f6ca820f89.pdf]

## **TAILS *Lm* supernatant (proteins found in 3 replicates)**

### **Master Protein Descriptions**

Phosphatidylcholine cholinephosphohydrolase  
Quinol oxidase subunit 2  
NusG\_II domain-containing protein  
Cysteine synthase  
Uncharacterized protein  
Glycerophosphoryl diester phosphodiesterase  
Lipoprotein  
Internalin B  
Tagatose 1,6-diphosphate aldolase  
Spermidine/putrescine transport system permease  
Sulfatase domain-containing protein  
Uncharacterized protein  
GW domain-containing protein  
Uncharacterized protein  
ABC transport system  
Signal peptidase I  
DNA gyrase subunit B  
Universal stress protein  
Protease IV  
Uncharacterized protein  
Peptide/nickel transport system substrate-binding protein  
G5 domain-containing protein  
Putative septation protein SpoVG  
Aspartyl/glutamyl-tRNA(Asn/Gln) amidotransferase subunit B  
50S ribosomal protein L25  
YycH protein  
Thiol-activated cytolysin  
DivIC protein  
Fumarate reductase flavoprotein subunit  
Probable transcriptional regulatory protein LMRG\_00061  
Peptidoglycan-N-acetylglucosamine deacetylase PgdA  
Probable succinyl-diaminopimelate desuccinylase  
LytR\_cpsA\_psr domain-containing protein  
10 kDa chaperonin  
Manganese-binding lipoprotein mntA  
DD-transpeptidase  
4-hydroxy-tetrahydrodipicolinate reductase  
Histidine kinase  
Flagellar hook protein FlgE  
Phage capsid protein  
Aminotransferase  
Peptidoglycan bound protein  
CBM6 domain-containing protein  
30S ribosomal protein S5  
Phosphoglycerol transferase  
FeS assembly protein SufD  
Uncharacterized protein

### **Accessions**

A0A0H3G8P1  
A0A0H3G8T0  
A0A0H3G991  
A0A0H3G9A7  
A0A0H3G9Q4  
A0A0H3G9S8  
A0A0H3G9T8  
A0A0H3G9Y9  
A0A0H3GA75  
A0A0H3GAF1  
A0A0H3GAG2  
A0A0H3GBD8  
A0A0H3GBE7  
A0A0H3GBP9  
A0A0H3GBZ4  
A0A0H3GC68  
A0A0H3GCB7  
A0A0H3GCF8  
A0A0H3GCG3  
A0A0H3GCN8  
A0A0H3GCP2  
A0A0H3GCT9  
A0A0H3GCV1  
A0A0H3GCW2  
A0A0H3GCW8  
A0A0H3GD67  
A0A0H3GD84  
A0A0H3GD99  
A0A0H3GDC3  
A0A0H3GDD6  
A0A0H3GDH9  
A0A0H3GDI0  
A0A0H3GDK2  
A0A0H3GDS3  
A0A0H3GDS9  
A0A0H3GDX6  
A0A0H3GDZ1  
A0A0H3GE39  
A0A0H3GEC2  
A0A0H3GEG6  
A0A0H3GEK9  
A0A0H3GES0  
A0A0H3GET7  
A0A0H3GFB3  
A0A0H3GFC6  
A0A0H3GFE5  
A0A0H3GFH4

|                                                             |            |
|-------------------------------------------------------------|------------|
| Potassium-transporting ATPase KdpC subunit                  | A0A0H3GFI3 |
| Glyceraldehyde-3-phosphate dehydrogenase                    | A0A0H3GFI9 |
| HTH lacI-type domain-containing protein                     | A0A0H3GFM6 |
| Peptidase_M23 domain-containing protein                     | A0A0H3GFN8 |
| SSD domain-containing protein                               | A0A0H3GFS0 |
| Peptide/nickel transport system substrate-binding protein   | A0A0H3GFV1 |
| Signal peptidase I                                          | A0A0H3GFV8 |
| 30S ribosomal protein S19                                   | A0A0H3GG04 |
| Elongation factor Tu                                        | A0A0H3GG29 |
| Peptidoglycan bound protein                                 | A0A0H3GGA1 |
| Transcription elongation factor GreA                        | A0A0H3GGF0 |
| N-acetylmuramoyl-L-alanine amidase                          | A0A0H3GGH0 |
| Transketolase                                               | A0A0H3GGH6 |
| Glutamyl-tRNA(Gln) amidotransferase subunit A               | A0A0H3GH17 |
| Multifunctional fusion protein                              | A0A0H3GH33 |
| Cell shape-determining protein MreC                         | A0A0H3GH53 |
| Actin-assembly inducing protein ActA                        | A0A0H3GH64 |
| 30S ribosomal protein S2                                    | A0A0H3GHH8 |
| Carboxyl-terminal processing protease                       | A0A0H3GI96 |
| Flagellin                                                   | A0A0H3GID7 |
| UPF0302 protein LMRG_01068                                  | A0A0H3GIF4 |
| Uncharacterized protein                                     | A0A0H3GJ46 |
| Peptide/nickel transport system substrate-binding protein   | A0A0H3GJB6 |
| Pyruvate dehydrogenase E1 component subunit alpha           | A0A0H3GJB7 |
| 50S ribosomal protein L18                                   | A0A0H3GJD7 |
| FAD:protein FMN transferase                                 | A0A0H3GJF7 |
| 30S ribosomal protein S12                                   | A0A0H3GJH5 |
| Polar amino acid transport system ATP-binding protein       | A0A0H3GJI6 |
| Dihydroxyacetone kinase L subunit                           | A0A0H3GJL3 |
| dITP/XTP pyrophosphatase                                    | A0A0H3GJR4 |
| Multiple sugar transport system substrate-binding protein   | A0A0H3GJY9 |
| Uncharacterized protein                                     | A0A0H3GK85 |
| Transcriptional regulator LytR                              | A0A0H3GKG2 |
| N-acetylmuramoyl-L-alanine amidase                          | A0A0H3GKJ7 |
| 50S ribosomal protein L14                                   | A0A0H3GKP3 |
| Peptidoglycan bound protein                                 | A0A0H3GKR6 |
| Polar amino acid transport system substrate-binding protein | A0A0H3GKX3 |
| 60 kDa chaperonin                                           | A0A0H3GLZ0 |
| Polar amino acid transport system substrate-binding protein | A0A0H3GMT4 |
| Enolase                                                     | A0A0H3GN27 |
| D-glutamyl-L-m-Dpm peptidase P45                            | A0A0H3GN80 |

## 2D SDS-PAGE *Lm* supernatant (proteins found in 3 replicates)

| Master Protein Descriptions                                  | Accessions |
|--------------------------------------------------------------|------------|
| Phosphatidylcholine cholinephosphohydrolase                  | A0A0H3G8P1 |
| Thiol-activated cytolysin                                    | A0A0H3GD84 |
| Fumarate reductase flavoprotein subunit                      | A0A0H3GDC3 |
| Peptidase_M23 domain-containing protein                      | A0A0H3GFN8 |
| Peptidoglycan bound protein                                  | A0A0H3GGA1 |
| Peptide/nickel transport system substrate-binding protein    | A0A0H3GJB6 |
| Transcriptional regulator LytR                               | A0A0H3GKG2 |
| 60 kDa chaperonin                                            | A0A0H3GLZ0 |
| D-glutamyl-L-m-Dpm peptidase P45                             | A0A0H3GN80 |
| Internalin D                                                 | A0A0H3G8X7 |
| Flagellar hook capping protein                               | A0A0H3GA06 |
| Peptidoglycan bound protein                                  | A0A0H3GAK6 |
| DUF5105 domain-containing protein                            | A0A0H3GAX9 |
| Multiple sugar transport system substrate-binding protein    | A0A0H3GCT3 |
| Uncharacterized protein (PepSY domain-containing protein)    | A0A0H3GCV0 |
| 1-phosphatidylinositol phosphodiesterase                     | A0A0H3GCV8 |
| Invasion-associated protein p60 (Probable endopeptidase p60) | A0A0H3GDY4 |
| Thioredoxin-like_fold domain-containing protein              | A0A0H3GFB7 |
| Phosphocarrier protein HPr                                   | A0A0H3GFK1 |
| Antigen A                                                    | A0A0H3GGY8 |
| Beta-lactamase domain-containing protein                     | A0A0H3GI09 |
| N-acetylmuramoyl-L-alanine amidase                           | A0A0H3GJB3 |
| DNA-directed RNA polymerase subunit alpha                    | A0A0H3GJC8 |
| Competence protein ComEA                                     | A0A0H3GKB9 |
| Uncharacterized protein                                      | A0A0H3GMD3 |
| Putative septation protein SpoVG                             | A0A0H3GD80 |
| Peptide/nickel transport system substrate-binding protein    | A0A0H3GH20 |
| Penicillin binding protein 2B                                | A0A0H3GLV8 |
| FeS assembly ATPase SufC                                     | A0A0H3GMZ0 |
